# Supplementary material for: The functional brain networks that underlie Early Stone Age tool manufacture
Source: Springer Nature journal article supplement (doi:10.1038/s41562-017-0102), 2017-05-05
Supplement: 41562_2017_BFs415620170102_MOESM1_ESM.pdf [file 41562_2017_BFs415620170102_MOESM1_ESM.pdf]

In the format provided by the authors and unedited.

# The Functional Brain Networks that Underlie Early Stone Age Tool Manufacture

*Supplementary Information*

Shelby S. Putt\*<sup>1,2</sup>, Sobanawartiny Wijekumar<sup>3</sup>, Robert G. Franciscus<sup>4</sup>, John P. Spencer\*<sup>3</sup>

<sup>1</sup>The Stone Age Institute.

<sup>2</sup>Center for Research into the Anthropological Foundations of Technology, Indiana University.

<sup>3</sup>School of Psychology, University of East Anglia.

<sup>4</sup>Department of Anthropology, University of Iowa.

\*Corresponding authors: [ssputt@indiana.edu](mailto:ssputt@indiana.edu), [J.Spencer@uea.ac.uk](mailto:J.Spencer@uea.ac.uk)

## Supplementary Discussion

### *Behavioural Results*

Every participant was successful at removing flakes from a cobble by the final neuroimaging session. The statistical analysis of the debitage-related variables did not reveal a clear pattern of higher skill among one group over the other (Supplementary Table 1). Both groups produced a similar proportion of flakes to shatter on both low quality and high quality material, though the verbal group made significantly more whole flakes relative to flake fragments. The verbal group, on average, produced more flake mass than the nonverbal group, though this difference was not significant. Otherwise, both groups reduced a similar amount of shatter mass from the original cobble during the Oldowan task, leaving a similar amount of material unexploited on the core. The verbal group had fewer missed strikes than the nonverbal group, which could signify increased skill, but this difference was not significant. Some significant differences between the groups occurred among the measures of flake shape. The flakes produced by the nonverbal group had a shape that was significantly thinner and longer than those produced by the verbal group, which replicates the results of a previous study that looked at differences in knapping skill between verbally- and nonverbally-instructed novices in an interactive teaching environment<sup>18</sup>. The flakes made by the nonverbal group also had significantly smaller platforms relative to flake size than the verbal group, though platform shape on its own did not significantly differ between groups.

There is no evidence from the statistical analysis of the core tools that one group excelled over the other (Supplementary Table 1). Both groups had an almost identical proportion of successful bifaces (verbal = 0.652, nonverbal = 0.650). The verbal group's bifaces had a larger average breadth to thickness ratio than the nonverbal group, but this difference was not significant. These results imply that the two groups reached similar levels of skill, and any differences in localized neural activation reflect the type of tool constructed (Oldowan, Acheulian) and the training context (verbal, nonverbal).

**Supplementary Table 1.** Group differences in knapping skill using debitage and core variables

| Variable                                      | Nonverbal |       |      | Verbal |       |       | Statistic           | Sig.    |
|-----------------------------------------------|-----------|-------|------|--------|-------|-------|---------------------|---------|
|                                               | N         | Mean  | S.D. | N      | Mean  | S.D.  |                     |         |
| Platform shape (width/thickness)              | 1719      | 3.68  | 2.42 | 1609   | 3.50  | 2.07  | 1.22 <sup>D</sup>   | 0.103   |
| Flake shape (size/mass)                       | 3157      | 2.96  | 4.16 | 2711   | 2.34  | 3.85  | 4.78 <sup>D</sup>   | <0.001* |
| Relative platform area                        | 1710      | 27.54 | 33.1 | 1604   | 33.41 | 36.78 | 2.81 <sup>D</sup>   | <0.001* |
| Proportion of flakes to shatter               | 35        | 0.89  | 0.10 | 36     | 0.89  | 0.11  | 612.00 <sup>U</sup> | 0.836   |
| Proportion of flakes on low quality material  | 32        | 0.84  | 0.15 | 35     | 0.85  | 0.16  | 589.00 <sup>U</sup> | 0.715   |
| Proportion of flakes on high quality material | 31        | 0.93  | 0.09 | 30     | 0.91  | 0.12  | 422.50 <sup>U</sup> | 0.535   |
| Proportion of flakes to flake fragments       | 35        | 0.57  | 0.18 | 36     | 0.66  | 0.17  | 2.35 <sup>t</sup>   | 0.021*  |
| Proportion of flake mass removed              | 35        | 0.48  | 0.20 | 36     | 0.56  | 0.22  | 771.00 <sup>U</sup> | 0.105   |
| Proportion of shatter mass removed            | 35        | 0.11  | 0.12 | 36     | 0.12  | 0.18  | 693.00 <sup>U</sup> | 0.469   |
| Proportion of remaining core mass             | 35        | 0.32  | 0.20 | 36     | 0.28  | 0.22  | 490.00 <sup>U</sup> | 0.107   |
| Relative number of missed strikes             | 35        | 0.15  | 0.22 | 36     | 0.12  | 0.10  | 671.00 <sup>U</sup> | 0.637   |
| Biface ratio (breadth/thickness)              | 13        | 1.89  | 0.34 | 15     | 2.00  | 0.54  | 0.62 <sup>t</sup>   | 0.538   |

\*Significant at  $p < 0.05$

<sup>D</sup>A Kolmogorov-Smirnov test was applied to cases with non-normal distributions and unequal variances. Statistic here refers to a *D* statistic.

<sup>U</sup>A Mann-Whitney U test was applied to cases with non-normal distributions and equal variances. Statistic here refers to a *U* statistic.

<sup>t</sup>Student's t-test was applied to cases with normal distributions and equal variances. Statistic here refers to a *t* statistic.

### Preliminary Meta-Analysis

Previous neuroarchaeological research suggests that stone knapping behaviours do not require working memory involvement but do overlap with language-processing areas<sup>1,14,15,17</sup>. This interpretation was based mainly on the lack of activation in the dorsolateral prefrontal cortex, which is considered to be an important component of the working memory system. This claim may have been premature, however, as working memory is a distributed neural system with multiple integrated, cortical regions. Indeed, a recent ALE meta-analysis of neuroimaging studies focused on stone knapping reveals that working memory plays an essential role in stone knapping, especially during Acheulian tool replication<sup>67</sup>. By plotting the coordinates of eight significant clusters from a recent neuroarchaeological study<sup>1</sup> in the same space as the coordinates from a visual working memory (VWM) meta-analysis<sup>19</sup> and a language-processing meta-analysis that includes phonological, lexico-semantic, and sentence processing neuroimaging studies<sup>34</sup>, we also found that stone knapping functional activation not only overlaps with language centres but also overlaps with the VWM network, a fact that has been overlooked in previous studies (Supplementary Fig. 1).

### Neuroimaging Results

fNIRS is unique in that it simultaneously measures the changes in concentration of both oxygenated haemoglobin (oxy-Hb) and deoxygenated haemoglobin (deoxy-Hb). Here we present the results for both chromophores. Supplementary Table 2 shows the list of all significant ANOVA results related to the oxy-Hb signal. The results reported in the main text (highlighted in grey in Supplementary Table 2) reflect active clusters with the highest-order effect (an Interaction effect in the case of overlap between a Main Effect and an Interaction; a Main Effect otherwise) that were also significantly higher than the motor baseline task. Effects that were not

significantly greater than motor baseline but lie within the temporal cortex were also included because we did not control for sound production in the motor baseline task. In total, we focused on six clusters that showed a significant effect of Task and four clusters where Oldowan and Acheulian toolmaking were modulated by the linguistic context of training. Note that all of the Group main effects were subsumed by an overlapping Task x Group interaction.

Supplementary Table 3 shows the list of all significant ANOVA results related to concentrations of deoxy-Hb. The ANOVA revealed multiple clusters showing a significant main effect of Group and Task, as well as significant Group x Task interactions. Ten of these significant clusters overlapped spatially with significant oxy-Hb clusters. In nine of these clusters, there was an inverse relationship between deoxy-Hb and oxy-Hb (highlighted in grey in Supplementary Table 3). Oxy-Hb and deoxy-Hb signals tend to be negatively correlated with each other<sup>68</sup>. Critically, six of these nine clusters overlapped with the oxy-Hb results reported in the main text, including the right temporal pole, left superior temporal gyrus, right postcentral gyrus, left middle frontal gyrus, and two areas in the left precentral gyrus (PrG; Supplementary Fig. 3). These deoxy-Hb results lend further support to the conclusions reached in the main text.

**Supplementary Table 2.** Regions of significant activation (oxy-Hb) as determined by a two-way ANOVA between Group (verbal and nonverbal) and Task (Oldowan and Acheulian)<sup>1</sup>.

| Localization                    |                                        | Sig. Effect <sup>2</sup> | MNI Coordinates (mm) |       |      | Volume (mm <sup>3</sup> ) | <i>M</i> Δoxy-Hb (μM) ± SEM |
|---------------------------------|----------------------------------------|--------------------------|----------------------|-------|------|---------------------------|-----------------------------|
|                                 |                                        |                          | x                    | y     | z    |                           |                             |
| <b>Task main effect</b>         |                                        |                          |                      |       |      |                           |                             |
| Left                            | Superior temporal gyrus                | A>O                      | -60.8                | -31.9 | 17.7 | 3600                      | 6.18 ± 0.06                 |
| Left                            | Precentral gyrus* <sup>α</sup>         | O>A                      | -31.7                | -4.3  | 59.7 | 3584                      | 6.26 ± 0.07                 |
| Right                           | Postcentral gyrus <sup>α</sup>         | A>O                      | 46                   | -25.2 | 62   | 1688                      | 5.07 ± 0.05                 |
| Right                           | Postcentral gyrus*                     | O>A                      | 58.5                 | -14.7 | 32.3 | 1624                      | 6.55 ± 0.12                 |
| Left                            | Precentral gyrus*                      | A>O                      | -50.2                | 5.8   | 33.5 | 1104                      | 4.92 ± 0.05                 |
| Right                           | Middle temporal gyrus                  | A>O                      | 67.7                 | -33.6 | 2.8  | 536                       | 4.39 ± 0.02                 |
| Right                           | Precentral gyrus <sup>α</sup>          | A>O                      | 61.9                 | 7     | 28.7 | 432                       | 5.81 ± 0.20                 |
| Left                            | Supplementary motor area*              | A>O                      | -9.9                 | 1.4   | 75.7 | 352                       | 4.73 ± 0.07                 |
| Left                            | Postcentral gyrus*                     | O>A                      | -50.7                | -14.2 | 32.8 | 320                       | 5.18 ± 0.11                 |
| <b>Group main effect</b>        |                                        |                          |                      |       |      |                           |                             |
| Right                           | Rolandic operculum <sup>α</sup>        | NV>V                     | 63.4                 | -12.3 | 11.6 | 6904                      | 7.03 ± 0.10                 |
| Left                            | Inferior parietal lobule* <sup>α</sup> | NV>V                     | -55.2                | -31.4 | 38.9 | 6312                      | 7.38 ± 0.08                 |
| Left                            | Superior frontal gyrus* <sup>α</sup>   | NV>V                     | -22.5                | -0.7  | 65.8 | 5688                      | 6.48 ± 0.06                 |
| Right                           | Postcentral gyrus <sup>α</sup>         | NV>V                     | 36.3                 | -33.1 | 71   | 328                       | 5.30 ± 0.13                 |
| <b>Group x Task interaction</b> |                                        |                          |                      |       |      |                           |                             |
| Right                           | Temporal pole                          | V: O>A; A: NV>V          | 57.3                 | 9.6   | -5.8 | 4968                      | 6.83 ± 0.08                 |
| Left                            | Middle frontal gyrus*                  | NV: O>A; O: NV>V         | -27.9                | -1.4  | 64.9 | 4928                      | 8.40 ± 0.13                 |
| Right                           | Supramarginal gyrus                    | O: NV>V                  | 63.7                 | -26   | 19.9 | 4008                      | 6.39 ± 0.07                 |
| Left                            | Supramarginal gyrus                    | V: A>O; O: NV>V          | -55.5                | -42.6 | 33   | 2456                      | 5.13 ± 0.04                 |
| Right                           | Postcentral gyrus                      | V: A>O; O: NV>V          | 46.7                 | -32   | 62.8 | 1864                      | 6.88 ± 0.13                 |
| Right                           | Postcentral gyrus                      | NV: A>O                  | 60.3                 | -2    | 30.2 | 1192                      | 5.78 ± 0.11                 |
| Right                           | Inferior frontal gyrus*                | A: V>NV                  | 51.4                 | 37.2  | 13.5 | 776                       | 4.79 ± 0.05                 |
| Left                            | Precentral gyrus*                      | NS                       | -40.3                | 6.5   | 46.2 | 624                       | 5.00 ± 0.06                 |

<sup>1</sup>Grey highlighted areas reflect active clusters with the highest-order effect (an Interaction effect in the case of overlap between a Main Effect and an Interaction; a Main Effect otherwise) that were also significantly higher than the motor baseline task.

<sup>2</sup>A=Acheulian, O=Oldowan, V=Verbal, NV=Nonverbal, NS=Not significant

\*Indicates cluster where knapping activation is significantly higher than motor baseline activation

<sup>α</sup>Main effect subsumed by an Interaction effect. Note that localization labels reflect the centre of mass of each cluster using MNI labelling conventions; thus, labels used for overlapping main effects and interactions might differ because the centres of mass differed.

**Supplementary Table 3.** Regions of significant activation (deoxy-Hb) as determined by a two-way ANOVA between Group (verbal and nonverbal) and Task (Oldowan and Acheulian).<sup>1</sup>

| Localization                    |                                       | Sig. Effect <sup>2</sup>       | MNI Coordinates (mm) |       |      | Volume (mm <sup>3</sup> ) | <i>M</i> Δdeoxy-Hb (μM) ± SEM |
|---------------------------------|---------------------------------------|--------------------------------|----------------------|-------|------|---------------------------|-------------------------------|
|                                 |                                       |                                | x                    | y     | z    |                           |                               |
| <b>Task main effect</b>         |                                       |                                |                      |       |      |                           |                               |
| Right                           | Precentral gyrus <sup>a</sup>         | O>A                            | 43.1                 | -16.2 | 59.5 | 2728                      | 5.24 ± 0.04                   |
| Left                            | Precentral gyrus                      | O>A                            | -49.2                | -2.6  | 33.9 | 944                       | 5.18 ± 0.08                   |
| Right                           | Postcentral gyrus <sup>a</sup>        | A>O                            | 58.9                 | -12.7 | 29.6 | 920                       | 5.27 ± 0.08                   |
| Left                            | Superior temporal gyrus               | O>A                            | -62.1                | -37.6 | 14.7 | 744                       | 4.91 ± 0.06                   |
| Right                           | Inferior frontal gyrus                | A>O                            | 53.0                 | 29.1  | 15.7 | 704                       | 5.02 ± 0.08                   |
| Left                            | Middle frontal gyrus                  | O>A                            | -39.3                | 30.0  | 41.0 | 600                       | 4.94 ± 0.07                   |
| Left                            | Inferior frontal gyrus                | O>A                            | -53.4                | 15.7  | 34.5 | 400                       | 4.57 ± 0.05                   |
| Right                           | Superior parietal lobule <sup>a</sup> | A>O                            | 36.0                 | -59.8 | 60.4 | 384                       | 4.46 ± 0.04                   |
| <b>Group main effect</b>        |                                       |                                |                      |       |      |                           |                               |
| Left                            | Superior temporal gyrus               | NV>V                           | -59.6                | -17.4 | 10.7 | 1920                      | 5.74 ± 0.07                   |
| Right                           | Postcentral gyrus                     | V>NV                           | 55.9                 | -24.0 | 45.8 | 1120                      | 5.74 ± 0.11                   |
| Left                            | Precentral gyrus <sup>a</sup>         | NV>V                           | -41.9                | 0.7   | 50.0 | 648                       | 4.83 ± 0.05                   |
| Left                            | Middle frontal gyrus                  | V>NV                           | -46.4                | 28.2  | 34.0 | 640                       | 5.00 ± 0.06                   |
| <b>Group x Task interaction</b> |                                       |                                |                      |       |      |                           |                               |
| Right                           | Precentral gyrus                      | NV: A>O;<br>V: O>A; O:<br>V>NV | 52.3                 | -4.6  | 49.9 | 2704                      | 6.25 ± 0.09                   |
| Left                            | Precentral gyrus                      | O: NV>V                        | -40.4                | 7.9   | 46.9 | 2384                      | 6.33 ± 0.09                   |
| Left                            | Precentral gyrus                      | NS                             | -26.7                | -0.6  | 58.8 | 2016                      | 5.38 ± 0.06                   |
| Right                           | Superior parietal lobule              | NS                             | 40.8                 | -50.0 | 62.4 | 1120                      | 5.52 ± 0.08                   |
| Right                           | Superior temporal gyrus               | NV: O>A;<br>A: V>NV            | 59.2                 | -21.6 | 6.9  | 1000                      | 4.80 ± 0.04                   |
| Left                            | Superior temporal gyrus               | V: A>O; A:<br>V>NV             | -64.4                | -9.6  | 0.4  | 928                       | 4.66 ± 0.04                   |
| Right                           | Postcentral gyrus                     | O: NV>V                        | 59.7                 | -12.0 | 29.7 | 856                       | 5.30 ± 0.09                   |
| Right                           | Supramarginal gyrus                   | NS                             | 59.3                 | -45.6 | 35.5 | 856                       | 4.72 ± 0.04                   |
| Right                           | Middle frontal gyrus                  | NV: O>A                        | 41.6                 | 13.3  | 55.5 | 784                       | 5.17 ± 0.09                   |
| Left                            | Paracentral lobule                    | O: V>NV                        | -7.9                 | -32.2 | 78.2 | 632                       | 4.83 ± 0.06                   |
| Right                           | Inferior frontal gyrus                | O: NV>V                        | 60.0                 | 17.5  | 3.2  | 504                       | 5.27 ± 0.09                   |
| Right                           | Postcentral gyrus                     | NS                             | 33.2                 | -37.5 | 66.2 | 440                       | 4.65 ± 0.05                   |
| Right                           | Middle temporal gyrus                 | V: A>O; A:<br>V>NV             | 68.9                 | -20.6 | -7.6 | 424                       | 4.66 ± 0.04                   |
| Right                           | Inferior frontal gyrus                | NV: O>A                        | 63.3                 | -12.6 | 29.3 | 224                       | 4.65 ± 0.08                   |

<sup>1</sup>Grey highlighted rows represent clusters that overlap and share an inverse relationship with significant oxy-Hb clusters (see Supplementary Table 1).

<sup>2</sup>A=Acheulian, O=Oldowan, V=Verbal, NV=Nonverbal, NS=Not significant

<sup>a</sup>Main effect subsumed by an Interaction effect. Note that localization labels reflect the centre of mass of each cluster using MNI labelling conventions; thus, labels used for overlapping main effects and interactions might differ because the centres of mass differed.

## Supplementary Figures

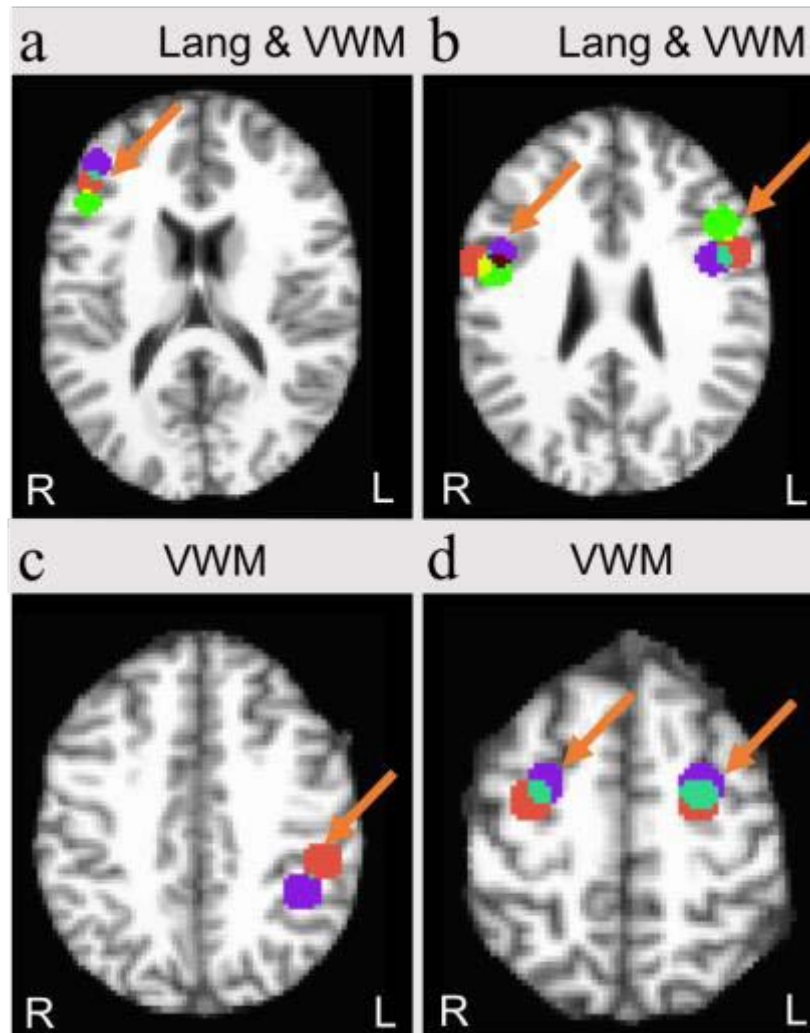

**Supplementary Figure 1.** Areas of functional overlap between a prior study of early stone age knapping<sup>1</sup> (red), language-processing<sup>34</sup> (light green), and/or VWM<sup>19</sup> (purple), including (a) right inferior frontal gyrus (*pars triangularis*), (b) bilateral ventral PrG, (c) left inferior parietal lobule, and (d) bilateral dorsal PrG. Overlap between spheres is represented by turquoise, mauve, and yellow colours. This figure demonstrates that stone knapping overlaps with the VWM network to an even greater extent than it overlaps with language centres.

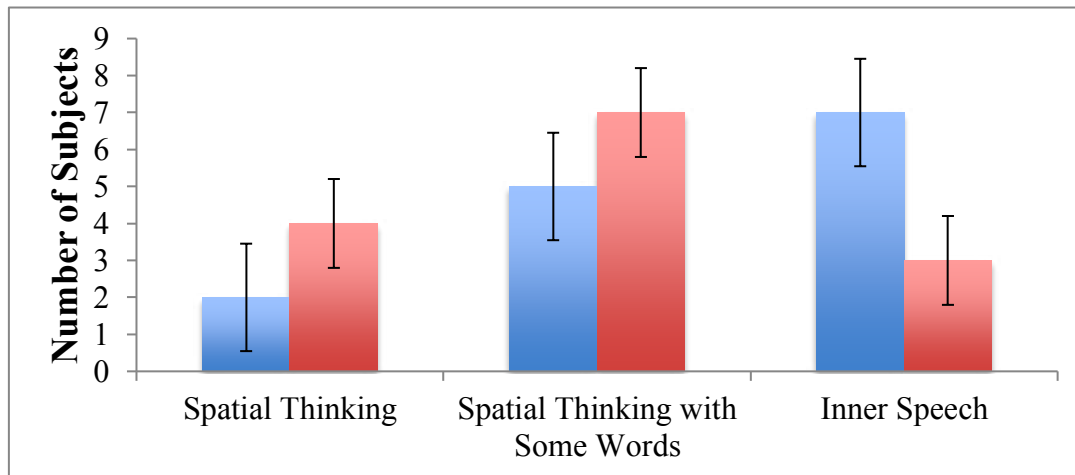

**Supplementary Figure 2.** Post-experiment interview subject responses by group (nonverbal = red;  $n = 14$ , verbal = blue;  $n = 14$ ) to the question, “Did you think with language while knapping?” Subjects’ responses were coded as one of three categories. A completely negative response to the question was coded as ‘Spatial Thinking.’ Responses that indicated minimal involvement of inner speech while thinking about the task were coded as ‘Spatial Thinking with Some Words,’ and participants who emphasized inner speech as their main mode of thinking or mentioned recalling entire phrases from the instruction videos were coded as ‘Inner Speech.’ Error bars represent standard error.



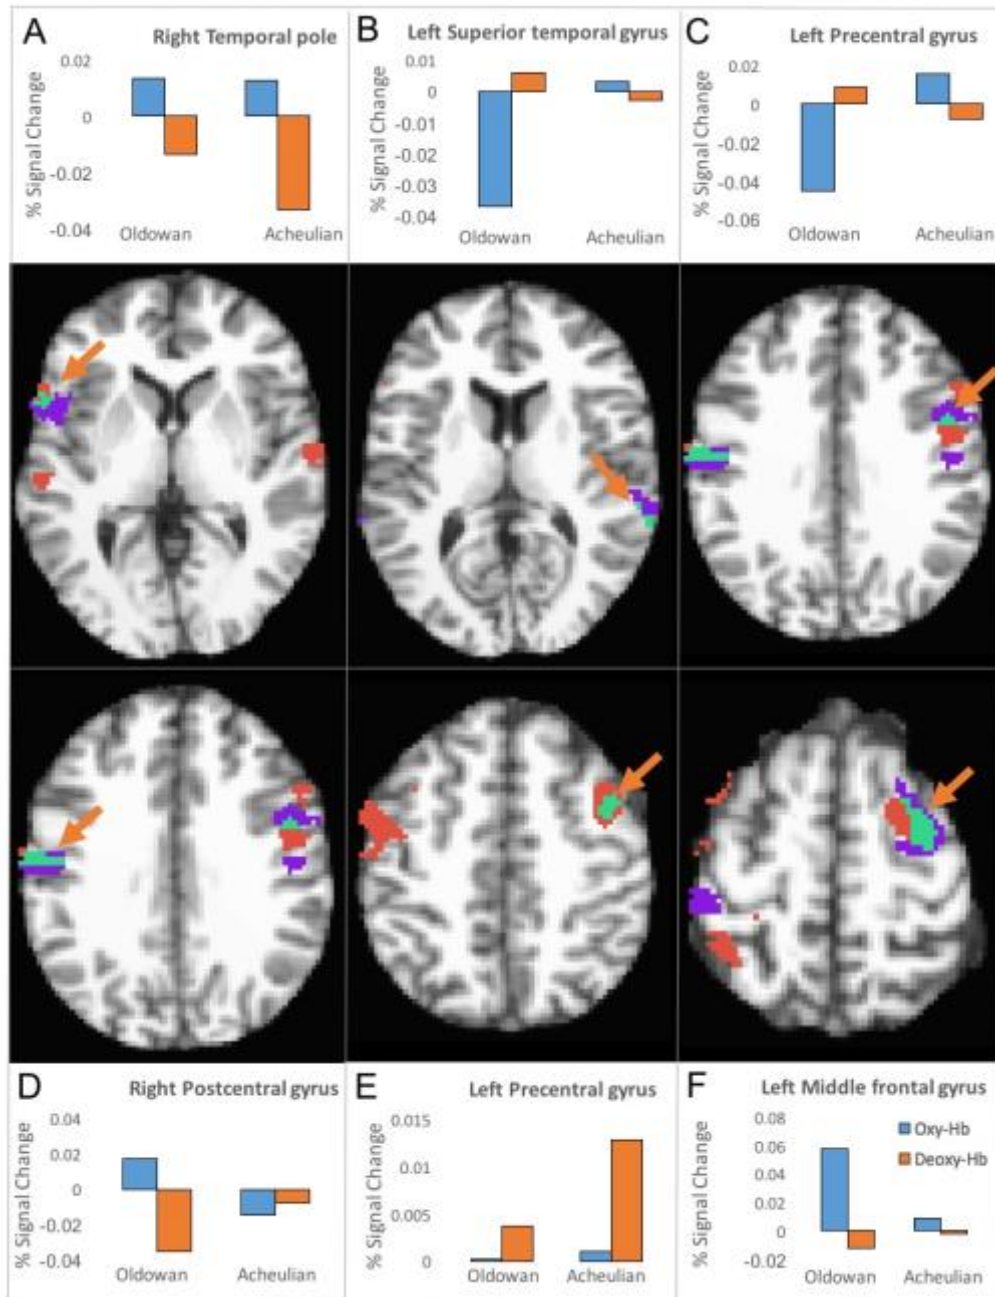

**Supplementary Figure 3.** Relationship between significant, overlapping oxy-Hb (purple) and deoxy-Hb (red) clusters ( $N = 31$ ). Overlap between clusters is represented by turquoise. Bar plots compare relative oxy-Hb (blue) and deoxy-Hb (orange) concentrations across tasks. % Signal Change is in  $\mu\text{M}$  units.

**Supplementary References**

67. Mahaney, R. A. “Cognition and Planning in Paleolithic Technology: Studies in Experimental Archaeology,” thesis, Indiana University, Bloomington (2015)
68. Cui, X., Bray, S., Reiss, A. L. Functional near infrared spectroscopy (NIRS) signal improvement based on negative correlation between oxygenated and deoxygenated hemoglobin dynamics. *NeuroImage* **49**, 3039-3046 (2010)
